# Supplementary material for: Automated measurement method for the determination of vitamin E in plasma lipoprotein classes
Source: PubMed Central journal article supplement — Sci Rep. 2014 Feb 13;4:4086. doi: 10.1038/srep04086 (PMC3923214; doi:10.1038/srep04086), 2014-02-13
Supplement: srep04086-s1.pdf [file srep04086-s1.pdf]

## Supplementary information

### Automated measurement method for the determination of vitamin E in plasma lipoprotein classes.

Yuji Hirowatari <sup>1\*</sup>, Hiroshi Yoshida <sup>2\*</sup>, Hideo Kurosawa <sup>3</sup>, Daisuke Manita <sup>1</sup>, Norio Tada <sup>4</sup>.

<sup>1</sup> Bioscience Division, TOSOH Corporation, Kanagawa, Japan

<sup>2</sup> Department of Laboratory Medicine, Jikei University Kashiwa Hospital, Chiba, Japan

<sup>3</sup> Clinical Laboratory Department, Inzai General Hospital, Chiba Japan.

<sup>4</sup> Clinical Medicine Research Institute, Jikei University Kashiwa Hospital, Chiba, Japan

Address of corresponding authors

Yuji Hirowatari, Ph.D.

Bioscience Division, TOSOH CORPORATION

2743-1 Hayakawa, Ayase, Kanagawa 252-1123, Japan

Phone: +81-467-76-9911

FAX: +81-467-76-9932

E-mail: [yuuji-hirowatari-bx@tosoh.co.jp](mailto:yuuji-hirowatari-bx@tosoh.co.jp)

Hiroshi Yoshida, MD, PhD, FAHA, FACP

Professor, Department of Laboratory Medicine,

Jikei University Kashiwa Hospital

163-1 Kashiwashita, Kashiwa Chiba 277-8567, Japan

Phone: +81-4-7164-1111 (ext. 2270)

FAX: +81-4-7164-1126

E-mail: [hyoshida@jikei.ac.jp](mailto:hyoshida@jikei.ac.jp)

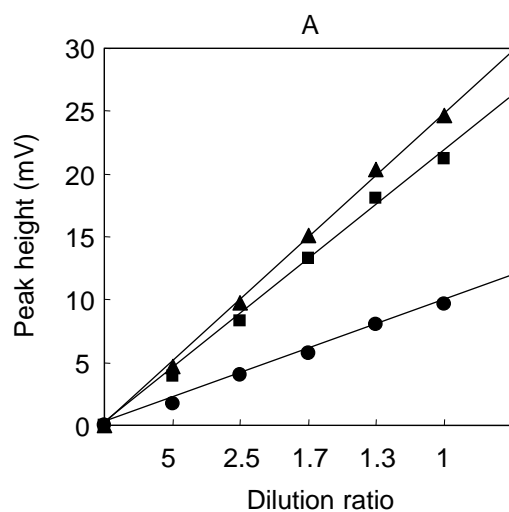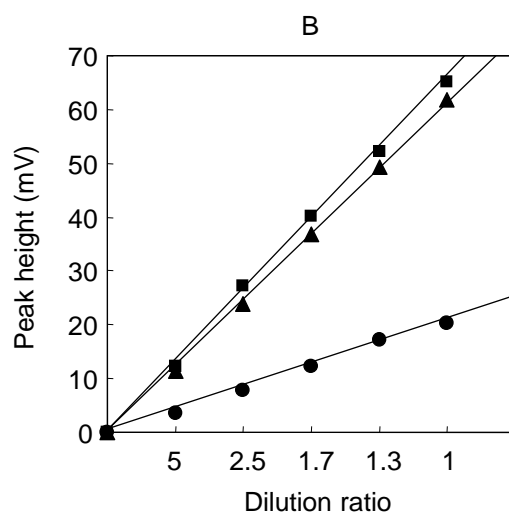

Supplementary Figure S1. Linearity of  $\gamma$ - and  $\alpha$ -tocopherol in lipoprotein classes.

A and B show the data of  $\gamma$ - and  $\alpha$ -tocopherol in lipoprotein classes. Tocopherols in HDL, LDL, and VLDL are represented by circles, triangles, and squares, respectively.

Supplementary Table S1. Precision data for tocopherol concentrations in lipoproteins

|           |                              | Between assay ( n=10 ) |                       |       | Within assay ( n=10 ) |                       |       |
|-----------|------------------------------|------------------------|-----------------------|-------|-----------------------|-----------------------|-------|
|           |                              | Mean                   | SD                    | CV    | Mean                  | SD                    | CV    |
|           |                              | ( $\mu\text{mol/L}$ )  | ( $\mu\text{mol/L}$ ) | (%)   | ( $\mu\text{mol/L}$ ) | ( $\mu\text{mol/L}$ ) | (%)   |
| Subject 4 | $\gamma$ -tocopherol in HDL  | 0.74                   | 0.07                  | 9.15  | 0.78                  | 0.05                  | 5.94  |
|           | $\alpha$ -tocopherol in HDL  | 6.70                   | 0.47                  | 7.00  | 7.09                  | 0.46                  | 6.53  |
|           | $\gamma$ -tocopherol in LDL  | 0.68                   | 0.06                  | 9.19  | 0.70                  | 0.05                  | 7.51  |
|           | $\alpha$ -tocopherol in LDL  | 7.04                   | 0.58                  | 8.21  | 7.27                  | 0.45                  | 6.23  |
|           | $\gamma$ -tocopherol in VLDL | 0.30                   | 0.04                  | 14.73 | 0.32                  | 0.04                  | 12.84 |
|           | $\alpha$ -tocopherol in VLDL | 2.52                   | 0.23                  | 8.99  | 2.69                  | 0.22                  | 8.20  |
| Subject 5 | $\gamma$ -tocopherol in HDL  | 0.78                   | 0.08                  | 9.73  | 0.74                  | 0.04                  | 5.54  |
|           | $\alpha$ -tocopherol in HDL  | 5.29                   | 0.50                  | 9.44  | 5.22                  | 0.26                  | 5.05  |
|           | $\gamma$ -tocopherol in LDL  | 1.05                   | 0.09                  | 8.79  | 1.04                  | 0.05                  | 4.73  |
|           | $\alpha$ -tocopherol in LDL  | 8.73                   | 0.69                  | 7.93  | 9.07                  | 0.57                  | 6.30  |
|           | $\gamma$ -tocopherol in VLDL | 0.73                   | 0.07                  | 9.15  | 0.73                  | 0.05                  | 6.31  |
|           | $\alpha$ -tocopherol in VLDL | 6.37                   | 0.60                  | 9.39  | 6.65                  | 0.39                  | 5.84  |

Supplementary Table S2. Recovery data of tocopherol.

|                              | Original<br>concentration<br>( $\mu\text{mol/L}$ ) | Added<br>amount<br>( $\mu\text{mol/L}$ ) | Amount<br>found<br>( $\mu\text{mol/L}$ ) | Recovery<br>rate<br>(%) |
|------------------------------|----------------------------------------------------|------------------------------------------|------------------------------------------|-------------------------|
| $\gamma$ -tocopherol in HDL  | 0.53                                               | 0.21                                     | 0.20                                     | 92                      |
|                              |                                                    | 0.32                                     | 0.33                                     | 101                     |
|                              |                                                    | 0.43                                     | 0.44                                     | 102                     |
| $\alpha$ -tocopherol in HDL  | 3.86                                               | 2.22                                     | 2.01                                     | 90                      |
|                              |                                                    | 3.33                                     | 3.74                                     | 112                     |
|                              |                                                    | 4.44                                     | 4.92                                     | 111                     |
| $\gamma$ -tocopherol in LDL  | 0.80                                               | 0.52                                     | 0.49                                     | 93                      |
|                              |                                                    | 0.79                                     | 0.77                                     | 98                      |
|                              |                                                    | 1.05                                     | 1.14                                     | 109                     |
| $\alpha$ -tocopherol in LDL  | 9.33                                               | 7.27                                     | 6.91                                     | 95                      |
|                              |                                                    | 10.90                                    | 11.68                                    | 107                     |
|                              |                                                    | 14.54                                    | 16.64                                    | 114                     |
| $\gamma$ -tocopherol in VLDL | 0.45                                               | 0.59                                     | 0.54                                     | 92                      |
|                              |                                                    | 0.88                                     | 0.92                                     | 104                     |
|                              |                                                    | 1.18                                     | 1.23                                     | 105                     |
| $\alpha$ -tocopherol in VLDL | 5.64                                               | 14.81                                    | 16.07                                    | 108                     |
|                              |                                                    | 22.41                                    | 24.10                                    | 108                     |
|                              |                                                    | 32.42                                    | 32.14                                    | 99                      |

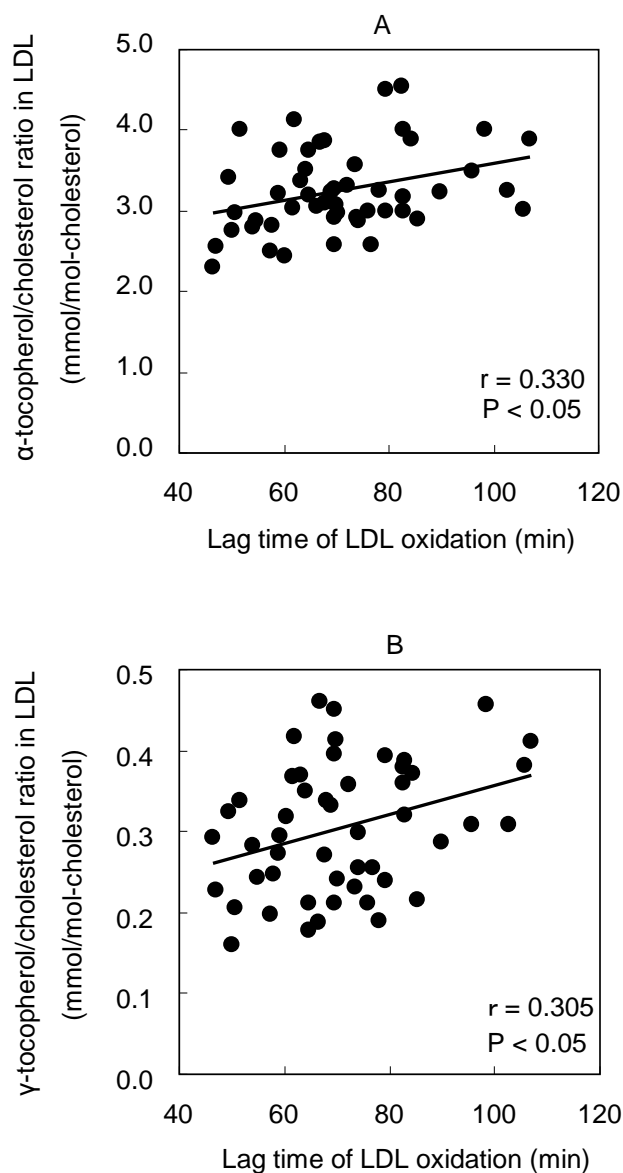

Supplementary Figure S2. Correlation between LDL oxidation lag-time and  $\gamma$ - and  $\alpha$ -tocopherol/cholesterol ratio in LDL.

Oxidation lag-times of LDL fraction obtained from plasma of 50 subjects by ultracentrifugation are analyzed. The levels of  $\gamma$ - and  $\alpha$ -tocopherol/cholesterol ratio in LDL are determined by the new estimated method. The data of 50 subjects are as follows: male/female = 37/13, age =  $52.8 \pm 13.8$  year, TC =  $5.06 \pm 0.67$  mmol/L, TG =  $1.26 \pm 0.61$  mmol/L.

Supplementary Table S3. Comparison of the sum of tocopherols in lipoprotein fractions with the plasma level.

| Plasma No. | $\gamma$ -tocopherol         |                              |                               |                                                |                                          | $\alpha$ -tocopherol    |                              |                              |                               |                                                |                                          |                         |
|------------|------------------------------|------------------------------|-------------------------------|------------------------------------------------|------------------------------------------|-------------------------|------------------------------|------------------------------|-------------------------------|------------------------------------------------|------------------------------------------|-------------------------|
|            | HDL<br>( $\mu\text{mol/L}$ ) | LDL<br>( $\mu\text{mol/L}$ ) | VLDL<br>( $\mu\text{mol/L}$ ) | Sum<br>(HDL+LDL+VLDL)<br>( $\mu\text{mol/L}$ ) | Plasma<br>level<br>( $\mu\text{mol/L}$ ) | Recovery<br>rate<br>(%) | HDL<br>( $\mu\text{mol/L}$ ) | LDL<br>( $\mu\text{mol/L}$ ) | VLDL<br>( $\mu\text{mol/L}$ ) | Sum<br>(HDL+LDL+VLDL)<br>( $\mu\text{mol/L}$ ) | Plasma<br>level<br>( $\mu\text{mol/L}$ ) | Recovery<br>rate<br>(%) |
| 1          | 1.18                         | 0.93                         | 0.37                          | 2.49                                           | 2.84                                     | 87                      | 6.18                         | 6.66                         | 2.00                          | 14.83                                          | 14.98                                    | 99                      |
| 2          | 0.90                         | 0.78                         | 0.20                          | 1.88                                           | 2.35                                     | 80                      | 8.65                         | 9.95                         | 2.34                          | 20.94                                          | 22.86                                    | 92                      |
| 3          | 1.81                         | 1.20                         | 0.35                          | 3.36                                           | 4.39                                     | 76                      | 9.68                         | 7.34                         | 1.75                          | 18.77                                          | 20.55                                    | 91                      |
| 4          | 0.45                         | 0.79                         | 0.41                          | 1.65                                           | 1.73                                     | 95                      | 3.47                         | 8.86                         | 4.20                          | 16.53                                          | 17.28                                    | 96                      |
| 5          | 0.93                         | 0.84                         | 0.29                          | 2.05                                           | 2.16                                     | 95                      | 6.99                         | 10.09                        | 2.67                          | 19.75                                          | 20.32                                    | 97                      |
| 6          | 1.38                         | 0.88                         | 0.28                          | 2.54                                           | 3.40                                     | 75                      | 11.66                        | 9.43                         | 3.50                          | 24.59                                          | 26.71                                    | 92                      |
| 7          | 1.11                         | 1.02                         | 0.40                          | 2.53                                           | 2.82                                     | 90                      | 8.84                         | 10.25                        | 2.83                          | 21.93                                          | 22.58                                    | 97                      |
| 8          | 1.13                         | 1.22                         | 0.46                          | 2.81                                           | 3.01                                     | 93                      | 7.45                         | 10.22                        | 3.21                          | 20.88                                          | 21.16                                    | 99                      |
| 9          | 0.93                         | 1.09                         | 0.43                          | 2.45                                           | 3.21                                     | 76                      | 7.20                         | 10.59                        | 3.35                          | 21.14                                          | 24.67                                    | 86                      |
| 10         | 0.77                         | 0.89                         | 0.71                          | 2.37                                           | 2.90                                     | 82                      | 4.61                         | 8.56                         | 5.43                          | 18.60                                          | 21.81                                    | 85                      |
| Mean       | 1.06                         | 0.96                         | 0.39                          | 2.41                                           | 2.88                                     | 85                      | 7.47                         | 9.19                         | 3.13                          | 19.79                                          | 21.29                                    | 93                      |
| SD         | 0.37                         | 0.16                         | 0.14                          | 0.48                                           | 0.73                                     | 8                       | 2.40                         | 1.33                         | 1.09                          | 2.78                                           | 3.38                                     | 5                       |
